1

## Genomic Abelian Finite Groups

2

3 Robersey Sanchez <sup>1</sup> and Jesús Barreto<sup>2</sup>

4

5 <sup>1</sup>Department of Biology. Pennsylvania State University, University Park, PA 16802.

6 E-mail: [rus547@psu.edu](mailto:rus547@psu.edu)

7 ORCID: <https://orcid.org/0000-0002-5246-1453>

8

9 <sup>2</sup>Universidad Central "Marta Abreu" de Las Villas. Santa Clara. Cuba.

10 E-mail: [barretouclv@gmail.com](mailto:barretouclv@gmail.com)

11

12 <sup>1</sup> Corresponding author:

13 [rus547@psu.edu](mailto:rus547@psu.edu)

14

### 15 Abstract

16 Experimental studies reveal that genome architecture splits into natural domains suggesting a well-  
17 structured genomic architecture, where, for each species, genome populations are integrated by  
18 individual mutational variants. Herein, we show that the architecture of population genomes from the  
19 same or closed related species can be quantitatively represented in terms of the direct sum of  
20 homocyclic abelian groups defined on the genetic code, where populations from the same species  
21 lead to the same canonical decomposition into  $p$ -groups. This finding unveils a new ground for the  
22 application of the abelian group theory to genomics and epigenomics, opening new horizons for the  
23 study of the biological processes (at genomic scale) and provides new lens for genomic medicine.

24

25 **Keywords:** Genomics, Genetic code, Abelian groups, genome algebra

26

27

## 28 **1 Introduction**

29 The analysis of the genome architecture is one of biggest challenges for the current and future  
30 genomics. Current bioinformatic tools make possible faster genome annotation process than some  
31 years ago [2]. Current experimental genomic studies suggest that genome architectures must obey  
32 specific mathematical biophysics rules [3–6].

33 Experimental results points to an injective relationship: *DNA sequence*  $\rightarrow$  *3D chromatin*  
34 *architecture* [3,4,6], and failures of DNA repair mechanisms in preserving the integrity of the DNA  
35 sequences lead to dysfunctional genomic rearrangements which frequently are reported in several  
36 diseases [5]. Hence, some hierarchical logic is inherent to the genetic information system that makes  
37 it feasible for mathematical studies. In particular, there exist mathematical biology reasons to analyze  
38 the genetic information system as a communication system [7–10].

39 Under the assumption that current forms of life evolved from simple primordial cells with very  
40 simple genomic structure and robust coding apparatus, the genetic code is a fundamental link to the  
41 primeval form of live, which played an essential role on the primordial architecture. The genetic  
42 code, the set of biochemical rules used by living cells to translate information encoded within genetic  
43 material into proteins, sets the basis for our understanding of the mathematical logic inherent to the  
44 genetic information system [9,11]. The genetic code is the cornerstone of live on earth. Not a single  
45 form of live could evolve or exist, as we currently know it, without the genetic code.

46 Several genetic code algebraic structures has been introduced to study effect of the quantitative  
47 relationship between the coding apparatus and the mutational process on protein-coding regions [12–  
48 16]. Formally the genetic code only is limited to translated coding regions where the number of RNA  
49 bases is a multiple of 3. However, as suggested in reference [17], the difficulties in prebiotic synthesis  
50 of the nucleosides components of RNA (nucleo-base + sugar) and suggested that some of the original  
51 bases may not have been the present purines or pyrimidines [18]. Piccirilli et al. [19] demonstrated  
52 that the alphabet can in principle be larger. Switzer et al. [20] have shown an enzymatic incorporation  
53 of new functionalized bases into RNA and DNA. This expanded the genetic alphabet from 4 to 5 or

54 more letters, which permits new base pairs, and provides RNA molecules with the potential to greatly  
55 increase their catalytic power.

56 It is important to notice that even in the current (*friendly*) environmental conditions not a single  
57 cell can survive without a DNA repair enzymatic machinery and that such an enzymatic machinery  
58 did not exist at all in the primaeval forms of life. Here, we are confronting the *chicken and egg*  
59 problem. To date, the best solution (to our knowledge) is the admission of alternative base-pairs in  
60 the primordial DNA alphabet which, as suggested in the studies on the prebiotic chemistry, could  
61 contribute to the thermal and general physicochemical stability of the primordial DNA molecules.

62 Several algebraic structures have been proposed including an additional letter into the DNA  
63 alphabet: A, C, G, T. The new letter (D) stands for current insertion deletion/mutations or for  
64 alternative wobble base pairing, which would be a relict fingerprint from primordial enzymes derived  
65 from a more degenerated ancestral genetic code [17,21,22]. Supporting evidence for the existence of  
66 a more degenerated ancestral genetic code built up on a larger alphabet is found in the tRNA anticodon  
67 region permitting wobble base pairing by including, e.g., bases such as: inosine (in eukariotes),  
68 agmatidine (in archaea), and lysidine (in bacteria), which has been proposed as evolutionary solutions  
69 to the need for lower the high translational noise connected to the reading of the AUA and AUG  
70 codons [23,24]. Additionally, various alternative base pairs like methylated cytosine and adenine are  
71 still present in the current genomes playing an important role in the epigenetic adaptation of  
72 organismal populations to the continuous environmental changes [10,25].

73 Cytosine DNA methylation results from the addition of methyl groups to cytosine C5 residues,  
74 and the configuration of methylation within a genome provides trans-generational epigenetic  
75 information. These epigenetic modifications can influence the transcriptional activity of the  
76 corresponding genes, or maintain genome integrity by repressing transposable elements and affecting  
77 long-term gene silencing mechanisms [26,27].

78 In this scenario, we shall show that all possible DNA molecules and, consequently, genomes  
79 can be described by way of finite abelian groups which can be split into the direct sum of homocyclic  
80 2-groups and 5-groups defined on the genetic code. A homocyclic group is a direct sum of cyclic

81 groups of the same order. Any finite abelian group can be decomposed into a direct sum of  
82 homocyclic  $p$ -groups [28], i.e., a group in which the order of every element is a power of a primer number  
83  $p$ .

84 The genetic code algebraic structures under scrutiny in the mentioned references covered rings  
85 and vector spaces with a common feature, the corresponding additive group is an abelian group of  
86 prime-power order. Next, to help a better comprehension of the current work, a brief introductory  
87 summary on these groups is provided. Results presented here generalizes the application of the  
88 genetic code algebras (reported in several publications) to the whole genome.

### 89 **1.1 Reported genetic code abelian groups relevant for the current study**

90 Herein, we assume that readers are familiar with the definition of abelian group, which otherwise can  
91 be found in textbooks and elsewhere including Wikipedia. Nevertheless, all the abelian groups  
92 discussed here are isomorphic to the well-known abelian groups of integer module  $n$ , which are easily  
93 apprehended by a college-average educated mind. For example, the abelian group defined on the set  
94  $\{0, 1, 2, 3, 4\}$ , which corresponds to the group of integer modulo 5 ( $\mathbb{Z}_5$ ), where  $(2 + 1) \bmod 5 = 3$ ,  
95  $(1 + 3) \bmod 5 = 4$ ,  $(2 + 3) \bmod 5 = 0$ , etc. The subjacent biophysical and biochemical reasonings to  
96 define the algebraic operations on the set of DNA bases and on the codon set were given in references  
97 [12,14,17].

#### 98 *1.1.1 The $\mathbb{Z}_{64}$ -algebras of the genetic code ( $C_g$ )*

99 The  $\mathbb{Z}_{64}$ -algebras of the genetic code ( $C_g$ ) and gene sequences were stated several years ago. In the  
100  $\mathbb{Z}_{64}$ -algebra  $C_g$  the sum operation, defined on the codon set, is a manner to consecutively obtain all  
101 codons from the codon AAC (UUG) in such a way that the genetic code will represent a non-  
102 dimensional code scale of amino acids interaction energy in proteins.

103 A description of the genetic code abelian finite group ( $C_g, +$ ) can be found in [12]. Group  
104  $(C_g, +)$  is isomorphic to the group on the set  $\mathbb{Z}_{2^6}$  (the sum of integer modulo 64), which formally  
105 will be expressed as  $(C_g, +) \cong (\mathbb{Z}_{2^6}, +)$ . This group on the set  $\mathbb{Z}_{2^6}$  (the sum of integer modulo 64).

106 The mapping of the set of codons  $X_1X_2X_3 \in C_g$  into the set  $\mathbb{Z}_{2^6}$  is straightforward after consider the  
 107 bijection  $A \leftrightarrow 0, C \leftrightarrow 1, G \leftrightarrow 2, U \leftrightarrow 3$  and the function  $g(x) = 4x_1 + 16x_2 + x_3$ . For example:

$$\begin{array}{r} \text{AGC} \leftrightarrow 33 \\ + \text{UGU} \leftrightarrow +47 \\ \hline \text{ACA} \leftrightarrow 16 \pmod{64} \end{array} \quad \begin{array}{r} \text{AGC} \leftrightarrow 33 \\ + \text{ACU} \leftrightarrow +18 \\ \hline \text{AUU} \leftrightarrow 51 \pmod{64} \end{array} \quad \begin{array}{r} \text{GGC} \leftrightarrow 41 \\ \text{CUA} \leftrightarrow +52 \\ \hline \text{UCC} \leftrightarrow 29 \pmod{64} \end{array}$$

108

109 The  $\mathbb{Z}_{64}$ -algebra  $C_g$ , however, is limited to protein-coding regions, while it is well known that,  
 110 in eukaryotes, only a small fraction of the genome –about 3%– called open reading frame (ORF)  
 111 encodes for proteins [18]. Since non-coding DNA sequences can have a base pairs number not  
 112 multiple of three, complete chromosomes and genomes cannot be described by means of group  
 113  $(C_g, +)$ . In addition, natural genomic variations that includes insertions and deletion mutations (indel  
 114 mutations) across individuals from the same population and close-related populations from different  
 115 species cannot be represented with group  $(C_g, +)$ .

116 *1.1.2 The  $(\mathbb{Z}_2^6, +)$  group of the genetic code ( $C_g$ )*

117 Group  $(C_g, +)$  is the additive group of a module over a ring, which however, do not conform to a  
 118 vector space. To build a genetic code vector space, a Galois field ( $GF(4)$ ) structure in the ordered base  
 119 set  $B = \{G, U, A, C\}$  was introduced in reference [14]. In particular, an isomorphism with the Galois  
 120 field is defined by means of its binary representation  $\mathbb{Z}_2 \times \mathbb{Z}_2 = \{(0, 0), (0, 1), (1, 0), (1, 1)\}$ , i.e. a  
 121 unique  $GF(4)$  up to isomorphism exists, such that a bijection  $f : \{G, U, A, C\} \leftrightarrow \mathbb{Z}_2 \times \mathbb{Z}_2$  from the  
 122 DNA base set  $B = \{G, U, A, C\}$  to the set of binary duplets  $(\alpha_1, \alpha_2)$  is stated., where  $\alpha_i \in \mathbb{Z}_2 = \{0, 1\}$   
 123 , for  $i \in \{1, 2\}$ . For example, the bijection  $f$  is defined as:

124 
$$f(G) = (0, 0), f(U) = (0, 1), f(A) = (1, 0), f(C) = (1, 1).$$

125 The additive group of bases is the Klein four-group, which is defined by the group presentation:

126 
$$V = \{U, A \mid U + U = A + A = C + C = G, A + U = C\}, \text{ i.e., } (B, +) \cong (\mathbb{Z}_2^2, +).$$
 Next, the abelian group

127 on the set of codons  $B^3$  was defined as the direct third power  $B^3 = B \times B \times B$  of the group  $(B, +)$ , i.e.

128  $(B^3, +) = (B, +) \times (B, +) \times (B, +)$ , which is isomorphic to the group:  $(\mathbb{Z}_2^6, +) = (\mathbb{Z}_2^2, +) \times (\mathbb{Z}_2^2, +) \times (\mathbb{Z}_2^2, +)$   
129 , i.e.,  $(B^3, +) \cong (\mathbb{Z}_2^6, +)$ . The sum operation on the set  $(B^3, +)$  follows from the sum operation by  
130 coordinates.

131 As pointed out before by Crick, the first two bases of codons determine the physicochemical  
132 properties of aminoacids [29]. The four encoded amino acids of every class are either the same or  
133 show very similar physicochemical properties. This genetic code regularity is captured by the quotient  
134 group  $B^3/G_{GGA}$ , where  $G_{GGA}$  is a subgroup of  $B^3$  integrated by the elements  $\{GGG, GGA\}$  (the  
135 elements of the quotient group  $B^3/G_{GGA}$  are given in Table 5 from [14]). The quotient group  
136  $B^3/G_{GGA}$  is isomorphic to group  $(\mathbb{Z}_2^5, +) = (\mathbb{Z}_2^2, +) \times (\mathbb{Z}_2^2, +) \times (\mathbb{Z}_2, +)$ . Each element of this group  
137 represents an equivalence class of codons. Two triplets  $X_1X_2X_3$  and  $Y_1Y_2Y_3$  are equivalent if, and  
138 only if, the difference  $X_1X_2X_3 + Y_1Y_2Y_3 \in G_{DDA}$ . In biological terms, substitution mutations  
139 involving codons from the same class will not alter (or at least no substantially alter in most of the  
140 cases) the physicochemical properties of the encoded protein domains, since in the worst scenario  
141 involves aminoacids with very close physicochemical properties, with the exception of codon for  
142 aminoacid tryptophan.

### 143 1.1.3 The $\mathbb{Z}_{125}$ group of the extended genetic code ( $C_e$ )

144 The extension of the *genetic code group*  $(C_g, +)$  follows straightforward from the extension of the  
145 codon set, which is easily accomplished extending the source alphabet of the standard genetic code:  
146  $\{A, C, G, U\}$  and, consequently, extending the base triplet set (extended triplet) as  $X_1X_2X_3$ ,  $X_i \in \{D,$   
147  $A, C, G, U\}$  [22]. The new algebraic structure  $(C_e, +)$  is isomorphic to the abelian group defined on  
148 the set  $\mathbb{Z}_{5^3}$  (the sum of integer modulo 125), formally,  $(C_e, +) \cong (\mathbb{Z}_{5^3}, +)$ . The mapping of the set of  
149 codons  $X_1X_2X_3 \in C_e$  into the set  $\mathbb{Z}_{5^3}$  is straightforward after consider the bijection

150  $D \leftrightarrow 0, A \leftrightarrow 1, C \leftrightarrow 2, G \leftrightarrow 3, U \leftrightarrow 4$  and the function  $g(x) = 5x_1 + 25x_2 + x_3$  (see Table 1). For

151 example:

$$\begin{array}{rcl} \text{AGC} & \leftrightarrow & 82 \\ + \text{UGU} & \leftrightarrow & +99 \\ \hline \text{ACA} & \leftrightarrow & 56 \text{ mod } 125 \end{array} \qquad \begin{array}{rcl} \text{AGC} & \leftrightarrow & 82 \\ + \text{DCU} & \leftrightarrow & +54 \\ \hline \text{CDA} & \leftrightarrow & 11 \text{ mod } 125 \end{array} \qquad \begin{array}{rcl} \text{GGC} & \leftrightarrow & 92 \\ + \text{CUD} & \leftrightarrow & +110 \\ \hline \text{DGC} & \leftrightarrow & 77 \text{ mod } 125 \end{array}$$

152

153 **Table 1.** Ordered set of extended triplets corresponding to the elements from  $\mathbb{Z}_5^3$

| a | D  |     | A  |     |      | C  |     | G  |     | U   |      |     |     |   |   |
|---|----|-----|----|-----|------|----|-----|----|-----|-----|------|-----|-----|---|---|
|   | I  | III | I  | III |      | I  | III | I  | III | I   | III  |     |     |   |   |
| D | 0  | DDD | 25 | DAD |      | 50 | DCD | 75 | DGD | 100 | DUD  | D   |     |   |   |
|   | 1  | DDA | 26 | DAA |      | 51 | DCA | 76 | DGA | 101 | DUA  | A   |     |   |   |
|   | 2  | DDC | 27 | DAC |      | 52 | DCC | 77 | DGC | 102 | DUC  | C   |     |   |   |
|   | 3  | DDG | 28 | DAG |      | 53 | DCG | 78 | DGG | 103 | DUG  | G   |     |   |   |
|   | 4  | DDU | 29 | DAU |      | 54 | DCU | 79 | DGU | 104 | DUU  | U   |     |   |   |
| A | 5  | ADD | 30 | AAD |      | 55 | ACD | 80 | AGD | 105 | AUD  | D   |     |   |   |
|   | 6  | ADA | 31 | AAA | K    | 56 | ACA | T  | 81  | AGA | R    | 106 | AUA | I | A |
|   | 7  | ADC | 32 | AAC | N    | 57 | ACC | T  | 82  | AGC | S    | 107 | AUC | I | C |
|   | 8  | ADG | 33 | AAG | K    | 58 | ACG | T  | 83  | AGG | R    | 108 | AUG | M | G |
|   | 9  | ADU | 34 | AAU | N    | 59 | ACU | T  | 84  | AGU | S    | 109 | AUU | I | U |
| C | 10 | CDD | 35 | CAD |      | 60 | CCD |    | 85  | CGD |      | 110 | CUD |   | D |
|   | 11 | CDA | 36 | CAA | Q    | 61 | CCA | P  | 86  | CGA | R    | 111 | CUA | L | A |
|   | 12 | CDC | 37 | CAC | H    | 62 | CCC | P  | 87  | CGC | R    | 112 | CUC | L | C |
|   | 13 | CDG | 38 | CAG | Q    | 63 | CCG | P  | 88  | CGG | R    | 113 | CUG | L | G |
|   | 14 | CDU | 39 | CAU | H    | 64 | CCU | P  | 89  | CGU | R    | 114 | CUU | L | U |
| G | 15 | GDD | 40 | GAD |      | 65 | GCD |    | 90  | GGD |      | 115 | GUD |   | D |
|   | 16 | GDA | 41 | GAA | E    | 66 | GCA | A  | 91  | GGA | G    | 116 | GUA | V | A |
|   | 17 | GDC | 42 | GAC | D    | 67 | GCC | A  | 92  | GGC | G    | 117 | GUC | V | C |
|   | 18 | GDG | 43 | GAG | E    | 68 | GCG | A  | 93  | GGG | G    | 118 | GUG | V | G |
|   | 19 | GDU | 44 | GAU | D    | 69 | GCU | A  | 94  | GGU | G    | 119 | GUU | V | U |
| U | 20 | UDD | 45 | UAD |      | 70 | UCD |    | 95  | UGD |      | 120 | UUD |   | D |
|   | 21 | UDA | 46 | UAA | Stop | 71 | UCA | S  | 96  | UGA | Stop | 121 | UUA | L | A |
|   | 22 | UDC | 47 | UAC | Y    | 72 | UCC | S  | 97  | UGC | C    | 122 | UUC | F | C |
|   | 23 | UDG | 48 | UAG | Stop | 73 | UCG | S  | 98  | UGG | W    | 123 | UUG | L | G |
|   | 24 | UDU | 49 | UAU | Y    | 74 | UCU | S  | 99  | UGU | C    | 124 | UUU | F | U |

154 <sup>a</sup> Bijection between the base-triplets set and the elements from sets  $\mathbb{Z}_5^3$  as given in [22].

155

156 *1.1.4 The  $(\mathbb{Z}_5^3, +)$  group of the extended genetic code ( $C_e$ )*

157 The Galois field  $GF(5)$  of the DNA set of bases  $\mathfrak{B} = \{D, A, C, G, U\}$  was introduced in reference [17].

158 This structure led to the definition of a  $\mathbb{Z}_5$ -vector space  $\mathfrak{B}^3$  over the set  $\mathfrak{B}^3 = \mathfrak{B} \times \mathfrak{B} \times \mathfrak{B}$

159 isomorphic to the set  $\mathbb{Z}_5^3 = \mathbb{Z}_5 \times \mathbb{Z}_5 \times \mathbb{Z}_5$  [17,30]. But here, we are interested only in the abelian

160 groups  $(\mathfrak{B}, +)$  and  $(\mathfrak{B}^3, +)$ . After the bijection  $D \leftrightarrow 0, A \leftrightarrow 1, C \leftrightarrow 2, G \leftrightarrow 3, U \leftrightarrow 4$ , the sum

161 operation of two DNA bases follows from the sum operation on the Galois field  $GF(5)$  (i.e., on  $\mathbb{Z}_5$ ,

162 the sum of integers modulo 5). For example,  $C + U \leftrightarrow (2 + 4) \bmod 5 = 1 \leftrightarrow A$ . The sum operation  
163 on the set  $\mathfrak{B}^3$  follows from the sum operation by coordinates.

164 It is worthy to notice that there 24 way to define each one of the above mentioned algebraic  
165 structures [30,31]. Nevertheless, for each defined genetic code group, there is only one (genetic code  
166 abelian group) up to isomorphism, which lead to their representation as an abelian group, where the  
167 sum operation corresponds to the sum of integer modulo  $n \in \{2, 2^6, 5, 5^3\}$ .

## 168 2 The General Theoretical Model

169 Herein, it will be showed that, in a general scenario, the whole genome population from any species  
170 or close related species, can be algebraically represented as a direct sum of abelian cyclic groups or  
171 more specifically abelian  $p$ -groups. Basically, we propose the representation of multiple sequence  
172 alignments (MSA) of length  $N$  as the direct sum:

$$173 \quad G = \left(\mathbb{Z}_{p_1}\right)^{n_1} \oplus \left(\mathbb{Z}_{p_2}\right)^{n_2} \oplus \dots \oplus \left(\mathbb{Z}_{p_k}\right)^{n_k} \quad [1]$$

174 Where  $p_i \in \{2, 5, 2^6, 5^3\}$  and  $N = n_1 + n_2 + \dots + n_k$ . Here, we assume the usual definition of direct sum  
175 of groups [32]. Let  $B_i$  ( $i \in I = \{1, \dots, n\}$ ) be a family of subgroups of  $G$ , subject to the following two  
176 conditions:

177 1)  $\sum B_i = G$ . That is,  $B_i$  together generates  $G$ .

178 2) For every  $i \in I$ :  $B_i \cap \sum B_j = 0$ .

179 Then, it is said that  $G$  is the direct sum of its subgroups  $B_i$ , which formally is expressed by the  
180 expression:  $G = \bigoplus_i B_i$  or  $G = B_1 \oplus \dots \oplus B_n$ .

181 In superior organisms, genomic DNA sequences are integrated by intergenic regions and gene  
182 regions. The former are the larger regions, while the later includes the protein-coding regions as  
183 subsets. The MSA of DNA and protein-coding sequences reveals allocations of the nucleotide bases  
184 and aminoacids into stretched of *strings*. The alignment of these stretched would indicate the presence



185 of substitution, *indel* mutations. As a result, the alignment of a whole chromosome DNA sequences  
186 from several individuals from the same or close-related species can be split into well-defined  
187 subregions or domains, and each one of them can be represented as homocyclic abelian groups, i.e.,  
188 a cyclic group of *prime-power* order (Fig. 1). As a result, each DNA sequence is represented as a  $N$ -  
189 dimensional vector with numerical coordinates representing bases and codons.

190

191 **Fig.1.** A typical DNA multiple sequence alignment (MSA) including segments of protein-coding  
192 regions. A MSA would include the presence of substitution, insertion and deletion mutations (*indel*  
193 mutations). The aligned sequences can be grouped into blocks, which can be algebraically represented  
194 by abelian groups.  
195

196 An intuitive mathematical representation of MSA is implicit in Fig.1, with following  
197 observations:

198 a) Every DNA sequence from the MSA and every subsequence on it can be represented as a  
199 vector with element coordinates defined in some abelian group. For example,  
200  $(C_g, +) \cong (\mathbb{Z}_{64}, +)$ , the first five codons from the first DNA sequence from Fig. 1,  
201  $\{\text{ATA}, \text{CCC}, \text{ATG}, \text{GCC}, \text{AAC}\} \in (C_g, +)$ , can be represented by the vector of integers:  
202  $\{48, 21, 50, 25, 1\}$  where each coordinate is an element from group  $(\mathbb{Z}_{64}, +)$  (see Table 1  
203 from reference [12] and the introduction section).

204 b) Any MSA can be algebraically represented as a symbolic composition of abelian  
205 groups each one of them is isomorphic to an abelian group of integers module  $n$ . Such a  
206 composition can be algebraically represented as a direct sum of homocyclic abelian groups.  
207 For example, the multiple sequence alignment from Fig. 1 can be represented by the direct  
208 sum of abelian groups:

$$209 \quad G = (\mathbb{Z}_{2^6})^5 \oplus (\mathbb{Z}_5)^8 \oplus (\mathbb{Z}_{5^3})^5 \oplus (\mathbb{Z}_5)^7 \oplus (\mathbb{Z}_{5^3})^4 \quad [2]$$

210 In more specific scenario, the multiple sequence alignment from Fig. 1 can be represented by  
211 the direct sum of abelian 2-groups and 5-groups:

$$212 \quad G = (\mathbb{Z}_2^6)^5 \oplus (\mathbb{Z}_5)^8 \oplus (\mathbb{Z}_{5^3})^5 \oplus (\mathbb{Z}_5)^7 \oplus (\mathbb{Z}_2^6)^4 \quad [3]$$

213 Or strictly as the direct sum of abelian 5-groups:

$$214 \quad G = (\mathbb{Z}_5^3)^5 \oplus (\mathbb{Z}_5)^8 \oplus (\mathbb{Z}_{5^3})^5 \oplus (\mathbb{Z}_5)^7 \oplus (\mathbb{Z}_5^3)^4 \quad [4]$$

215 Although the above *direct sums* of abelian groups provides a useful compact representation of  
 216 MSA, for application purposes to genomics, we would also consider to use the concept of direct  
 217 product (*cartesian sum or complete direct sums*) [32]. Next, let  $S$  be a set of abelian cyclic groups  
 218 identified in the MSA  $M$  of length  $N$  (i.e., every DNA sequence from  $M$  has  $N$  bases). Let  $\ell_i$  the  
 219 number of bases or triples of bases covered on  $M$  by group  $S_i \in S$  where  $\sum_i \ell_i = N$ . Hence, each  
 220 DNA sequence on the  $M$  can be represented by a cartesian product  $(b_1, \dots, b_n)$  where  $b_i \in S_i$   
 221 ( $i = 1, \dots, n$ ) and  $n = |S|$ . Let  $\mathcal{G}_i$  be a group defined on the set of all elements  $(0, \dots, 0, b_i, 0, \dots, 0)$   
 222 where  $b_i \in S_i$  stands on the  $i^{th}$  place and 0 everywhere else. It is clear that  $S_i \cong \mathcal{G}_i$ . In this context,  
 223 the set of all vectors  $(b_1, \dots, b_n)$  with equality and addition of vectors defined coordinate-wise  
 224 becomes a group ( $\mathcal{G}$ ) named direct product (cartesian sum) of groups  $S_i$  ( $\mathcal{G}_i$ ), i.e.:

$$225 \quad \mathcal{G} = \otimes_i S_i = \oplus_i \mathcal{G}_i \quad [5]$$

226 An illustration of the cartesian sum application was given above in observation a).

### 227 **3 Results**

228 Results essentially comprise an application of the fundamental theorem of abelian finite groups  
 229 [28,32]. By this theorem every finite abelian group  $G$  is isomorphic to a direct sum of cyclic groups  
 230 of prime-power order of the form:

$$231 \quad G = \mathbb{Z}_{p_1^{\alpha_1}} \oplus \mathbb{Z}_{p_2^{\alpha_2}} \oplus \dots \oplus \mathbb{Z}_{p_n^{\alpha_n}} \quad [6]$$

232 Or (in short)  $G = \bigoplus_{i=1}^n \mathbb{Z}_{p_i^{\alpha_i}}$ , where the  $p_i$ 's are primes (not necessarily distinct),  $\alpha_i \in \mathbb{N}$  and  $\mathbb{Z}_{p_i^{\alpha_i}}$  is  
 233 the group of integer module  $p_i^{\alpha_i}$ . The abelian group representation of the MSA from Fig. 1 given by  
 234 expressions [1] and [2] correspond to the cases where the finite abelian group  $G$  is a direct sum of

235 *prime-power order*, while expression [3] reflects the fact that any finite abelian group can be  
236 decomposed into a direct sum of homocyclic  $p$ -groups [28,32], in this  $p = 5$ .

237 As is showed in Fig 1, this abelian group is a heterocyclic group that split into a direct sum of  
238 homocyclic *prime-power order*, each one of them split into the direct sum of cyclic  $p$ -groups with  
239 same order. For example, in expression [4] we have the subgroup:  $(\mathbb{Z}_5^3)^4 = \bigoplus_{i=1}^{12} \mathbb{Z}_5$ , which is a direct  
240 sum of 12 homocyclic 5-groups  $(\mathbb{Z}_5, +) \cong (\mathfrak{B}, +)$ . The case of  $\mathbb{Z}_{2^6}$  representation of the genetic code  
241 (as given in [12]) is less evident. It follows from the fact that the genetic code table is integrated by  
242 16 subsets of codons with form  $K = \{XYA, XYC, XYG, XYU\}$ , where  $X \in B$  and  $Y \in B$  are fixed,  
243 the sum operation on each set  $K$  is defined by coordinates as in the set of bases  $(B, \otimes)$ , and codon  
244  $XYA$  is taken as identity element. For example,  $K = \{CGA, CGC, CGG, CGU\}$  with codon CGA as  
245 identity element. In other words,  $(K, +) \cong (B, \otimes) \cong (\mathbb{Z}_2^2, +)$ , which corresponds to the Klein four  
246 group as defined on  $\mathbb{Z}_2^2$ .

247 Notice that for each fixed length  $N$  we can build manifold heterocyclic groups  $S_i$ , and each one  
248 of them can have different decomposition into  $p$ -groups. So, each group  $S_i$  could be characterized by  
249 means of their corresponding canonical decomposition into  $p$ -groups. This last detail is exemplified  
250 in Fig. 2, where an exon region from the enzyme *phospholipase B domain containing-2* (PLBD2)  
251 simultaneously encodes information for several aminoacids and carries the footprint to be targeted by  
252 the transcription factor REST. Four possible group representations for this exon subregion are  
253 suggested in the top of the figure (panel **a**). These types of protein-coding regions are called *duons*,  
254 since their base-triplets encode information not only for aminoacids but also for transcription  
255 enhancers [33–35].

256  
257 **Fig. 2.** The DNA sequence motifs targeted by transcription factors usually integrate genomic building  
258 block across several species. **a**, DNA sequence alignment of the protein-coding sequences from  
259 phospholipase B domain containing-2 (PLBD2) carrying the footprint sequence motif recognized  
260 (targeted) by the Silencing Transcription factor (REST), also known as Neuron-Restrictive Silencer  
261 Factor (NRSF) REST (NRSF). **b**, Sequence logo of the footprint motif recognized REST (NRSF) on  
262 the exons (derived from TF2DNA dataset [36]). **c**, Translation of the codon sequences using the one-  
263 letter symbol of the aminoacids.

264 The group representation is particularly interesting for the analysis of DNA sequence motifs,  
 265 which typically are highly conserved across the species. As suggested in Fig. 2, there are some  
 266 subregions of DNA or protein sequences where there are few or not gaps introduced and mostly  
 267 substitution mutations are found. Such subregions conform blocks that can cover complete DNA  
 268 sequence motifs targeted by DNA binding proteins like transcription factors, which are identifiable by  
 269 bioinformatic algorithm like BLAST [37]. Herein, the case of double coding called our attention,  
 270 where the DNA sequence simultaneously encode information transcription factor targeted sequence  
 271 motif and the codon sequence encoding for aminoacids. Notice that the abelian group  
 272  $(C_g, +) \cong (\mathbb{Z}_{64}, +)$  defined on the standard genetic code is enough to quantitatively describe these  
 273 motifs (Fig. 2). However, a further application of group theory together with additional knowledge  
 274 on the biological function this motif can lead to a more specific decomposition into abelian groups.

275 No matter how complex a genomic region might be, it has an abelian group representation.  
 276 As shown in Fig. 3, two different protein-coding (gene) models from two different genome  
 277 populations can lead to the same direct sum of abelian  $p$ -groups and the same final aminoacids  
 278 sequence (protein). The respective exon regions have different lengths and gaps (“-”, representing  
 279 base D in the extended genetic code) were added to exons 1 and 2 (from panel **a**) to preserve the  
 280 reading frame in the group representation (after transcription and splicing gaps are removed). Both  
 281 gene models, from panel **a** and **b**, however, lead to the same direct sum of abelian 5-groups:

$$282 \quad (\mathbb{Z}_5)^{n+7} \oplus (\mathbb{Z}_5^3)^3 \oplus (\mathbb{Z}_5)^{3+m+m+2} \oplus (\mathbb{Z}_5^3)^3 \oplus (\mathbb{Z}_5)^{n+8} .$$

283

284 **Fig. 3.** Two different protein-coding (gene) models can lead to the same abelian group representation  
 285 and the same protein sequence. A dummy intron was drawn carrying the typical sequence motif  
 286 targeted by the spliceosome the donor ( $GUR$ ) and acceptor ( $Y^m AG$ ) sites, where  $R \in \{A, G\}$  (purines)  
 287 and  $Y \in \{C, U\}$ ,  $X$  stands for any base, and  $n$  and  $m$  indicate the number of bases present in the  
 288 corresponding sub-sequences (pyrimidines). **a**, A gene model based on a *dummy* consensus sequence  
 289 where gaps representing base D from the extended genetic code were added to preserve the coding  
 290 frame, which naturally is restored by splicing soon after transcription. **b**, A gene model where both  
 291 exons, 1 and 2, carries a complete set of three codons (base-triplets). Both models, from panels **a** and  
 292 **b**, leads to the same canonical direct sum of abelian 5-groups.

293

294 An example considering changes on the gene-body reading frames as those introduced by  
295 alternative splicing is shown in Fig. 4. Gene-bodies with annotated alternative splicing can easily be  
296 represented by any of the groups  $(\mathbb{Z}_{5^3})^n$  or  $(\mathbb{Z}_5^3)^n$  (Fig.4a). The splicing scenario can include enhancer  
297 regions as well (Fig.4b).

298

299 **Fig. 4.** The abelian group representation of a given genome only depend on our current knowledge  
300 on its annotation. **a**, the alternative splicing specified for an annotated gene model does not alter the  
301 abelian group representation and only would add information for the decomposition of the existing  
302 cyclic groups into subgroups. **b**, a more complex gene model including detailed information on the  
303 promoter regions. A GC box (G5MG4CU) motif is located upstream of a TATA box (TATAWAW)  
304 motif in the promoter region. The GC box is commonly the binding site for Zinc finger proteins,  
305 particularly, Sp1 transcription factors. A putative GC box was included in exon 2, which is an atypical  
306 scenario, but it can be found, e.g., in the second exon from the gene encoding for sphingosine kinase  
307 1 (SPHK1), transcript variant 2 (NM\_182965, CCDS11744.1).

308

309 As commented in the introduction, cytosine DNA methylation is implicitly included in  
310 extended base-triple group representation. Typically, methylation analysis of methylomes is  
311 addressed to identify methylation changes induced by, for example, environmental changes,  
312 lifestyles, age, or diseases. So, in this case the letter D stands for methylated cytosine, since only  
313 epigenetic changes are evaluated. A concrete example with two genes from patients with pediatric  
314 acute lymphoblastic leukemia (PALL) is presented in Fig. 5.

315

316 **Fig. 5.** Vector representation of differentially methylated exons regions from genes EGEL7 and  
317 P2RY1 from patients with pediatric acute lymphoblastic leukemia (PALL). **a**. Segment of exon-6  
318 from gene EGFL7. **b**. Segment of exon-1 from gene P2RY1. Methylated cytosines are highlighted in  
319 yellow background. In PALL patients, gene EGEL7 mostly hypomethylated and gene P2RY1 mostly  
320 hypermethylated in respect to healthy individuals (WT). The encoded aminoacid sequence is given  
321 using the one letter symbols. Both genes, EGEL7 and P2RY1, were identified in the top ranked list  
322 of differentially methylated genes integrating clusters of hubs in the protein-protein interaction  
323 networks from PALL reported in reference [38].

324

325 It is obvious that the MSA from a whole genome population derives from the MSA of every  
326 genomic region, from the same or closed related species. At this point, it is worthy to recall that there  
327 is not, for example, just one human genome or just one from any other species, but populations of  
328 human genomes and genomes populations from other species. Since every genomic region can be

329 represented by the direct sum of abelian cyclic groups of prime-power order, then the whole genome  
 330 population from individuals from the same or closed related species can be represented as an abelian  
 331 group, which will be, in turns, the direct sum of abelian cyclic groups of prime-power order. Hence,  
 332 results lead us to the representation of whole genomes populations of individuals from the same  
 333 species or close related species (as suggested in Fig.1) by means of direct sum of their group  
 334 representation into abelian cyclic groups. A general illustration of this modelling would be, for  
 335 example:

$$336 \quad S = \dots \oplus (\mathbb{Z}_{5^3})^{n_1} \oplus \overbrace{(\mathbb{Z}_{2^6})^{m_1}}^{\text{motif}} \oplus (\mathbb{Z}_{5^3})^{n_2} \oplus \dots \oplus \overbrace{(\mathbb{Z}_2^2)^{m_2}}^{\text{domain}} \oplus \dots \oplus \overbrace{(\mathbb{Z}_{5^3})^{n_p}}^{\text{domain}} \oplus \overbrace{(\mathbb{Z}_{2^6})^{m_p}}^{\text{motif}} \dots [7]$$

337 That is, the fundamental theorem of abelian finite groups has an equivalent in genomics.

338 **Theorem 1.** The genomic architecture from a genome population can be quantitatively represented  
 339 as an abelian group isomorphic to a direct sum of cyclic groups of prime-power order.

340 The proof of this theorem is self-evident across the discussion and examples presented here.  
 341 Basically, the group representations of the genetic code lead to the group representations of local  
 342 genomic domains in terms of cyclic groups of prime-power order, for example,  $(\mathfrak{B}^3, +) \cong (\mathbb{Z}_5^3, +)$   
 343 or  $(C_e, +) \cong (\mathbb{Z}_{5^3}, +)$ , till covering the whole genome. As for any finite abelian group, the abelian  
 344 group representation of genome populations can be expressed in terms a direct sum of abelian cyclic  
 345 groups of prime-power order. Any new discovering on the annotation of given genome population  
 346 will only split an abelian group, already defined on some genomic domain/region, into the direct sum  
 347 of abelian subgroups ■.

## 348 4 Discussions

349 Under the assumption that the current forms of life are the result of an evolutionary process started  
 350 from very simple primordial cells, the current non-coding DNA must be the relict footprint of multiple  
 351 recombination of ancient DNA domains in all the permissible forms, which in ancient times were  
 352 rules by an ancient genetic code. In consequence, on this scenario, the group representations of the  
 353 genetic code are logically extended from relatively small local DNA domains to the whole genome.

354 Examples shown in Fig. 1 to 4 indicates whatever would be the genomic architecture for given  
355 species, the observed variations in the individual populations and in populations from closed related  
356 species, it can be quantitatively described as the direct sum of abelian cyclic groups. The  
357 discovering/annotation of new genomic features will only lead to the decomposition of previous  
358 known abelian cyclic groups representing some genomic subregion into direct sums of subgroups. In  
359 such algebraic representation DNA sequence motifs for which only substitution mutations happened  
360 are specifically represented by the abelian group  $(C_g, +) \cong (\mathbb{Z}_{64}, +)$ , in protein coding regions, and  
361 by any or combination of groups  $(B, +) \cong (\mathbb{Z}_2^2, +)$ ,  $(B^2, +) \cong (\mathbb{Z}_2^4, +)$  or  $B^3/G_{GGA} \cong (\mathbb{Z}_2^5, +)$  in  
362 non-protein coding regions.

363 Results indicate that the genome architecture of whole populations can be quantitatively studied  
364 in the framework of abelian group theory. Two sets of MSA,  $S_1$  and  $S_2$ , could split into different  
365 cyclic groups and, however, these sequences can be isomorphic between them because have the same  
366 canonical decomposition. Particularly, the genetic code abelian group  $(\mathfrak{B}^3, +) \cong (\mathbb{Z}_5^3, +)$  is enough  
367 for an algebraic representation of the genome population from the same species or close related  
368 species. However, such a decomposition is biologically poor and, as suggested in Figs. 4 to 5, masks  
369 relevant biological features from the genome architecture. A further decomposition into the direct  
370 sum of abelian groups will only depends on our knowledge on the genome annotation for specified  
371 species.

372 As suggested in Figs. 3 and 4, base D from the extended genetic code (represented as gaps in  
373 the MSA) results useful preserving the information on the natural reading frame in the abelian group  
374 representation. It is worthy to notices that, for the transcriptional and splicing enzymatic machinery,  
375 the information on the reading frame preservation is already in the sequence. Molecular machines  
376 perform precise logical operations [39], which in this case result in a sort of molecular *enthymeme*  
377 (logical) operation where the conclusion is omitted obeying the principle of cellular economy. In  
378 other words, in the algebraic representation of gene and genome populations base D carries real  
379 biological information.



380 From several examples provided here, it is clear that there exists a language for the genome  
381 architecture that can be represented in terms of sums of finite abelian groups. The future developments  
382 of genome annotation from several species can certainly lead to the discovery of logical rules of a  
383 such language determining the possible viable variations in the populations. As suggested in Fig. 5,  
384 the identification of quotient groups (at larger scale) can permit the stratification of large genome  
385 population into equivalence classes corresponding to individual subpopulations, each one of them  
386 carrying particular viable variations of species genome architecture.

387 As indicated in reference [12], natural genomic rearrangement like DNA recombination and  
388 translocation at structural and functional domain can be represented as group automorphisms and  
389 endomorphisms. Biologically, such description corresponds to the fact that the new genetic  
390 information is recreated, simply, by way of reorganization of the genetic material in the chromosomes  
391 of living organisms [5,40]. The analysis and discussion on the application of the endomorphism ring  
392 theory to describe the dynamics of genome population is a promising subject for further studies.

393 Particularly promising is the application of the genomic abelian groups on epigenomic studies,  
394 which results when base D stands for the methylated cytosine. As suggested in Fig.5, a precise  
395 decomposition of methylation motif into the direct sum of abelian finite group can leads to their  
396 classification into unambiguous equivalence classes. This open the doors for the application of based  
397 machine-learning bioinformatic approaches to study the methylation changes induced on individual  
398 populations by, e.g., environmental changes, aging process and diseases, which is of particular  
399 interest in genomic medicine [41].

400 Results presented here would have considerable positive impact on current molecular  
401 evolutionary biology, which heavily relies on evolutionary null hypotheses about the past. As  
402 suggested in reference [30], the genomic abelian groups open new horizons for the study of the  
403 molecular evolutionary stochastic processes (at genomic scale) and with relevant biomedical  
404 applications, founded on a deterministic ground, which only depends on the physicochemical  
405 properties of DNA bases and aminoacids. In this case, the only molecular evolutionary hypothesis  
406 needed about the past is a fact, the existence of the genetic code.



## 407 **5 Conclusions**

408 Results to date indicate that the genetic code and, ultimately, the physicochemical properties of DNA  
409 bases on which the genetic code algebraic structure are defined, has a deterministic effect or at least  
410 partially rules on the current genome architectures, in such a way that the abelian group  
411 representations of the genetic code are logically extended to the whole genome. In consequence, the  
412 fundamental theorem of abelian finite groups can be applied to the whole genome. This result opens  
413 new horizons for further genomics studies with the application of the abelian group theory, which  
414 currently is well developed and well documented [32,42].

415 Results suggest that the architecture of current population genomes is quite far from  
416 randomness and obeys deterministic rules. Although the random nature of the mutational process,  
417 only a small fraction of mutations is fixed in genomic populations. In particular, fixation events are  
418 ruled by the genetic code architecture, which as shown by Sanchez (2018), it can be simulated as an  
419 optimization process by using genetic algorithms [30]. This points to the study of the dynamics of  
420 genome populations as a stochastic deterministic process. Genome stochasticity derives from the  
421 stochasticity of mutational process and from the stochasticity of biochemical reactions, which gives  
422 rise to a rich population diversity and phenotypic plasticity that help to prevent population extinction.  
423 The deterministic part derives from its architecture, which can be represented in terms of a canonical  
424 direct sum of homocyclic abelian groups derived from the genetic code, hold for all the individuals  
425 from the same population/species.

## 426 **References**

- 427 1. Sanchez R, Barreto J, Morgado E, Grau R. Abelian Finite Group of DNA Genomic Sequences.  
428 arXiv Quant Methods. 2005; 1-6. <https://arxiv.org/abs/q-bio/0512042>. Available:  
429 [https://www.researchgate.net/publication/2183122\\_Abelian\\_Finite\\_Group\\_of\\_DNA\\_Genom](https://www.researchgate.net/publication/2183122_Abelian_Finite_Group_of_DNA_Genomic_Sequences)  
430 [ic\\_Sequences](https://www.researchgate.net/publication/2183122_Abelian_Finite_Group_of_DNA_Genomic_Sequences)
- 431 2. Whalen S, Truty RM, Pollard KS. Enhancer-promoter interactions are encoded by complex  
432 genomic signatures on looping chromatin. *Nat Genet.* 2016;48: 488–496. doi:10.1038/ng.3539
- 433 3. Nuebler J, Fudenberg G, Imakaev M, Abdennur N, Mirny LA. Chromatin organization by an  
434 interplay of loop extrusion and compartmental segregation. *Proc Natl Acad Sci U S A.*

- 435 2018;115: E6697–E6706. doi:10.1073/pnas.1717730115
- 436 4. Rowley MJ, Corces VG. Organizational principles of 3D genome architecture. *Nat Rev Genet.*  
437 Springer US; 2018;19: 789–800. doi:10.1038/s41576-018-0060-8
- 438 5. Piazza A, Heyer WD. Homologous Recombination and the Formation of Complex Genomic  
439 Rearrangements. *Trends Cell Biol.* Elsevier Ltd; 2019;29: 135–149.  
440 doi:10.1016/j.tcb.2018.10.006
- 441 6. Zheng H, Xie W. The role of 3D genome organization in development and cell differentiation.  
442 *Nat Rev Mol Cell Biol.* Springer US; 2019;20: 535–550. doi:10.1038/s41580-019-0132-4
- 443 7. Schneider TD. Evolution of biological information. *Nucleic Acids Res.* 2000;28: 2794–9.  
444 Available:  
445 [http://www.pubmedcentral.nih.gov/articlerender.fcgi?artid=102656&tool=pmcentrez&rende](http://www.pubmedcentral.nih.gov/articlerender.fcgi?artid=102656&tool=pmcentrez&rendertype=abstract)  
446 [rtype=abstract](http://www.pubmedcentral.nih.gov/articlerender.fcgi?artid=102656&tool=pmcentrez&rendertype=abstract)
- 447 8. Yockey HP. Origin of life on earth and Shannon’s theory of communication. *Comput Chem.*  
448 2000;24: 105–123. doi:10.1016/S0097-8485(99)00050-9
- 449 9. Sanchez R, Grau R. A genetic code Boolean structure. II. The genetic information system as  
450 a Boolean information system. *Bull Math Biol.* 2005/07/07. 2005;67: 1017–1029.  
451 doi:10.1016/j.bulm.2004.12.004
- 452 10. Sanchez R, Mackenzie SA. Information thermodynamics of cytosine DNA methylation.  
453 Bardoni B, editor. *PLoS One.* Public Library of Science; 2016;11: e0150427.  
454 doi:10.1371/journal.pone.0150427
- 455 11. Sánchez R, Morgado E, Grau R. A genetic code Boolean structure. I. The meaning of Boolean  
456 deductions. *Bull Math Biol.* 2005;67: 1–14. doi:10.1016/j.bulm.2004.05.005
- 457 12. Sanchez R, Morgado E, Grau R. Gene algebra from a genetic code algebraic structure. *J Math*  
458 *Biol.* 2005/07/14. 2005;51: 431–457. doi:10.1007/s00285-005-0332-8
- 459 13. Sanchez R, Morgado E, Grau R, Sánchez R. A genetic code Boolean structure. I. The meaning  
460 of Boolean deductions. *Bull Math Biol.* 2005/02/05. 2005;67: 1–14.  
461 doi:10.1016/j.bulm.2004.05.005
- 462 14. Sanchez R, Grau R, Morgado E. A novel Lie algebra of the genetic code over the Galois field  
463 of four DNA bases. *Math Biosci.* 2006;202: 156–174. doi:10.1016/j.mbs.2006.03.017
- 464 15. José M V., Zamudio GS, Morgado ER. A unified model of the standard genetic code. *R Soc*  
465 *Open Sci.* 2017;4: 1–13. doi:10.1098/rsos.160908
- 466 16. José M V., Morgado ER, Govezensky T. Genetic Hotels for the Standard Genetic Code:  
467 Evolutionary Analysis Based upon Novel Three-Dimensional Algebraic Models. *Bull Math*  
468 *Biol.* 2011;73: 1443–1476. doi:10.1007/s11538-010-9571-y
- 469 17. Sánchez R, Grau R. An algebraic hypothesis about the primeval genetic code architecture.  
470 *Math Biosci.* 2009/07/18. 2009;221: 60–76. doi:S0025-5564(09)00114-X [pii]

- 471 10.1016/j.mbs.2009.07.001
- 472 18. Orgel LE. Prebiotic chemistry and the origin of the RNA world. *Crit Rev Biochem Mol Biol.*  
473 2004;39: 99–123. doi:10.1080/10409230490460765
- 474 19. Piccirilli JA, Benner SA, Krauch T, Moroney SE, Benner SA. Enzymatic incorporation of a  
475 new base pair into DNA and RNA extends the genetic alphabet. *Nature.* 1990;343: 33–37.  
476 doi:10.1038/343033a0
- 477 20. Switzer C, Moronev SE, Benner SA. Enzymatic Incorporation of a New Base Pair into DNA  
478 and RNA. *J Am Chem Soc.* 1989;111: 8322–8323. doi:10.1021/ja00203a067
- 479 21. Sanchez R, Grau R, Morgado E. A Novel DNA Sequence Vector Space over an extended  
480 Genetic Code Galois Field. *MATCH Commun Math Comput Chem.* 2006;56: 5–20.  
481 Available: [http://match.pmf.kg.ac.rs/electronic\\_versions/Match56/n1/match56n1\\_5-20.pdf](http://match.pmf.kg.ac.rs/electronic_versions/Match56/n1/match56n1_5-20.pdf)
- 482 22. Sanchez R. Evolutionary Analysis of DNA-Protein-Coding Regions Based on a Genetic Code  
483 Cube Metric. *Curr Top Med Chem.* 2014;14: 407–417.  
484 doi:10.2174/1568026613666131204110022
- 485 23. Di Giulio M. LUCA as well as the ancestors of archaea, bacteria and eukaryotes were  
486 progenotes: Inference from the distribution and diversity of the reading mechanism of the  
487 AUA and AUG codons in the domains of life. *BioSystems. Elsevier B.V.;* 2020;198: 104239.  
488 doi:10.1016/j.biosystems.2020.104239
- 489 24. Di Giulio M. Errors of the ancestral translation, LUCA, and nature of its direct descendants.  
490 *BioSystems. Elsevier B.V.;* 2021;206: 104433. doi:10.1016/j.biosystems.2021.104433
- 491 25. Smith ZD, Meissner A. DNA methylation: Roles in mammalian development. *Nat Rev Genet.*  
492 Nature Publishing Group; 2013;14: 204–220. doi:10.1038/nrg3354
- 493 26. Severin PMD, Zou X, Gaub HE, Schulten K. Cytosine methylation alters DNA mechanical  
494 properties. *Nucleic Acids Res.* 2011;39: 8740–51. doi:10.1093/nar/gkr578
- 495 27. Sriraman A, Debnath TK, Xhemalce B, Miller KM. Making it or breaking it: DNA  
496 methylation and genome integrity. *Essays Biochem.* 2020; 687–703.  
497 doi:10.1042/ebc20200009
- 498 28. Fuchs L. Abelian groups. Publishing House of the Hungarian Academy of Sciences.  
499 Publishing House of the Hungarian Academy of Sciences; 1958.
- 500 29. Crick FHC. The Origin of the Genetic Code. *J Mol Biol.* 1968;38: 367–379.
- 501 30. Sanchez R. Symmetric Group of the Genetic-Code Cubes. Effect of the Genetic-Code  
502 Architecture on the Evolutionary Process. *MATCH Commun Math Comput Chem.* 2018;79:  
503 527–560. Available:  
504 [http://match.pmf.kg.ac.rs/electronic\\_versions/Match79/n3/match79n3\\_527-560.pdf](http://match.pmf.kg.ac.rs/electronic_versions/Match79/n3/match79n3_527-560.pdf)
- 505 31. José M V, Morgado ER, Sánchez R, Govezensky T. The 24 Possible Algebraic  
506 Representations of the Standard Genetic Code in Six or in Three Dimensions. *Adv Stud Biol.*

- 507 2012;4: 119–152. Available: <http://www.m-hikari.com/asb/asb2012/asb1-4-2012/joseASB1->  
508 4-2012-1.pdf
- 509 32. Fuchs L. Infinite Abelian Groups, Volume 1. 1st Editio. Academic Press; 1970.
- 510 33. Stergachis AB, Haugen E, Shafer A, Fu W, Vernot B, Reynolds A, et al. Exonic transcription  
511 factor binding directs codon choice and affects protein evolution. *Science* (80- ). 2013;342:  
512 1367–72. doi:10.1126/science.1243490
- 513 34. Reyna-Llorens I, Burgess SJ, Reeves G, Singh P, Stevenson SR, Williams BP, et al. Ancient  
514 duons may underpin spatial patterning of gene expression in C 4 leaves. *Proc Natl Acad Sci*  
515 U S A. 2018;115: 1931–1936. doi:10.1073/pnas.1720576115
- 516 35. Yadav VK, Smith KS, Flinders C, Mumenthaler SM, De S. Significance of duon mutations in  
517 cancer genomes. *Sci Rep. Nature Publishing Group*; 2016;6: 1–9. doi:10.1038/srep27437
- 518 36. Pujato M, Kieken F, Skiles AA, Tapinos N, Fiser A. Prediction of DNA binding motifs from  
519 3D models of transcription factors; identifying TLX3 regulated genes. *Nucleic Acids Res.*  
520 2014;42: 13500–13512. doi:10.1093/nar/gku1228
- 521 37. Yang M, Derbyshire MK, Yamashita RA, Marchler-Bauer A. NCBI’s Conserved Domain  
522 Database and Tools for Protein Domain Analysis. *Curr Protoc Bioinforma.* 2020;69: 1–25.  
523 doi:10.1002/cpbi.90
- 524 38. Sanchez R, Mackenzie SA. Integrative Network Analysis of Differentially Methylated and  
525 Expressed Genes for Biomarker Identification in Leukemia. *Sci Rep.* 2020;10: 2123.  
526 doi:10.1038/s41598-020-58123-2
- 527 39. Schneider TD. Theory of molecular machines. II. Energy dissipation from molecular  
528 machines. *J Theor Biol.* 1991;148: 125–137. Available:  
529 <http://www.ncbi.nlm.nih.gov/pubmed/2016881>
- 530 40. Yu M, Ren B. The three-dimensional organization of mammalian genomes. *Annu Rev Cell*  
531 *Dev Biol.* 2017;33: 265–289. doi:10.1146/annurev-cellbio-100616-060531
- 532 41. Salameh Y, Bejaoui Y, El Hajj N. DNA Methylation Biomarkers in Aging and Age-Related  
533 Diseases. *Front Genet.* 2020;11: 1–11. doi:10.3389/fgene.2020.00171
- 534 42. Fuchs L. Infinite Abelian Groups, Volume 2. Academic Press; 1973.
- 535

bioRxiv preprint doi: <https://doi.org/10.1101/2021.04.01.446543>; this version posted June 1, 2021. The copyright holder for this preprint (which was not certified by peer review) is the author/funder, who has granted bioRxiv a license to display the preprint in perpetuity. It is made available under aCC-BY 4.0 International license.

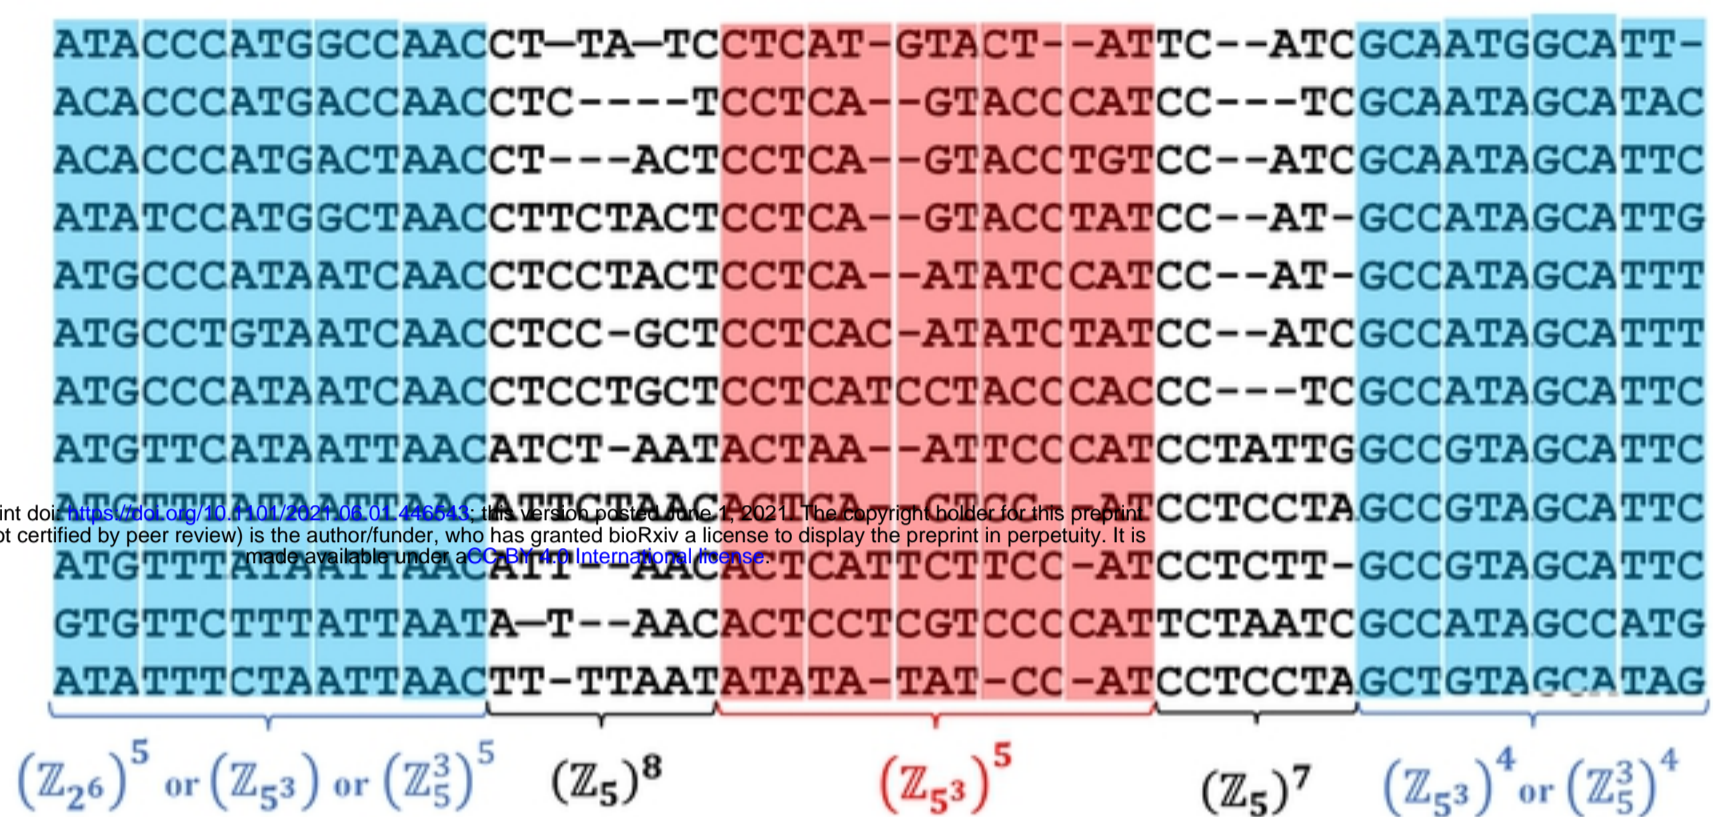

Figure 1



bioRxiv preprint doi: <https://doi.org/10.1101/2021.06.01.446543>; this version posted June 1, 2021. The copyright holder for this preprint (which was not certified by peer review) is the author/funder, who has granted bioRxiv a license to display the preprint in perpetuity. It is made available under aCC-BY 4.0 International license.

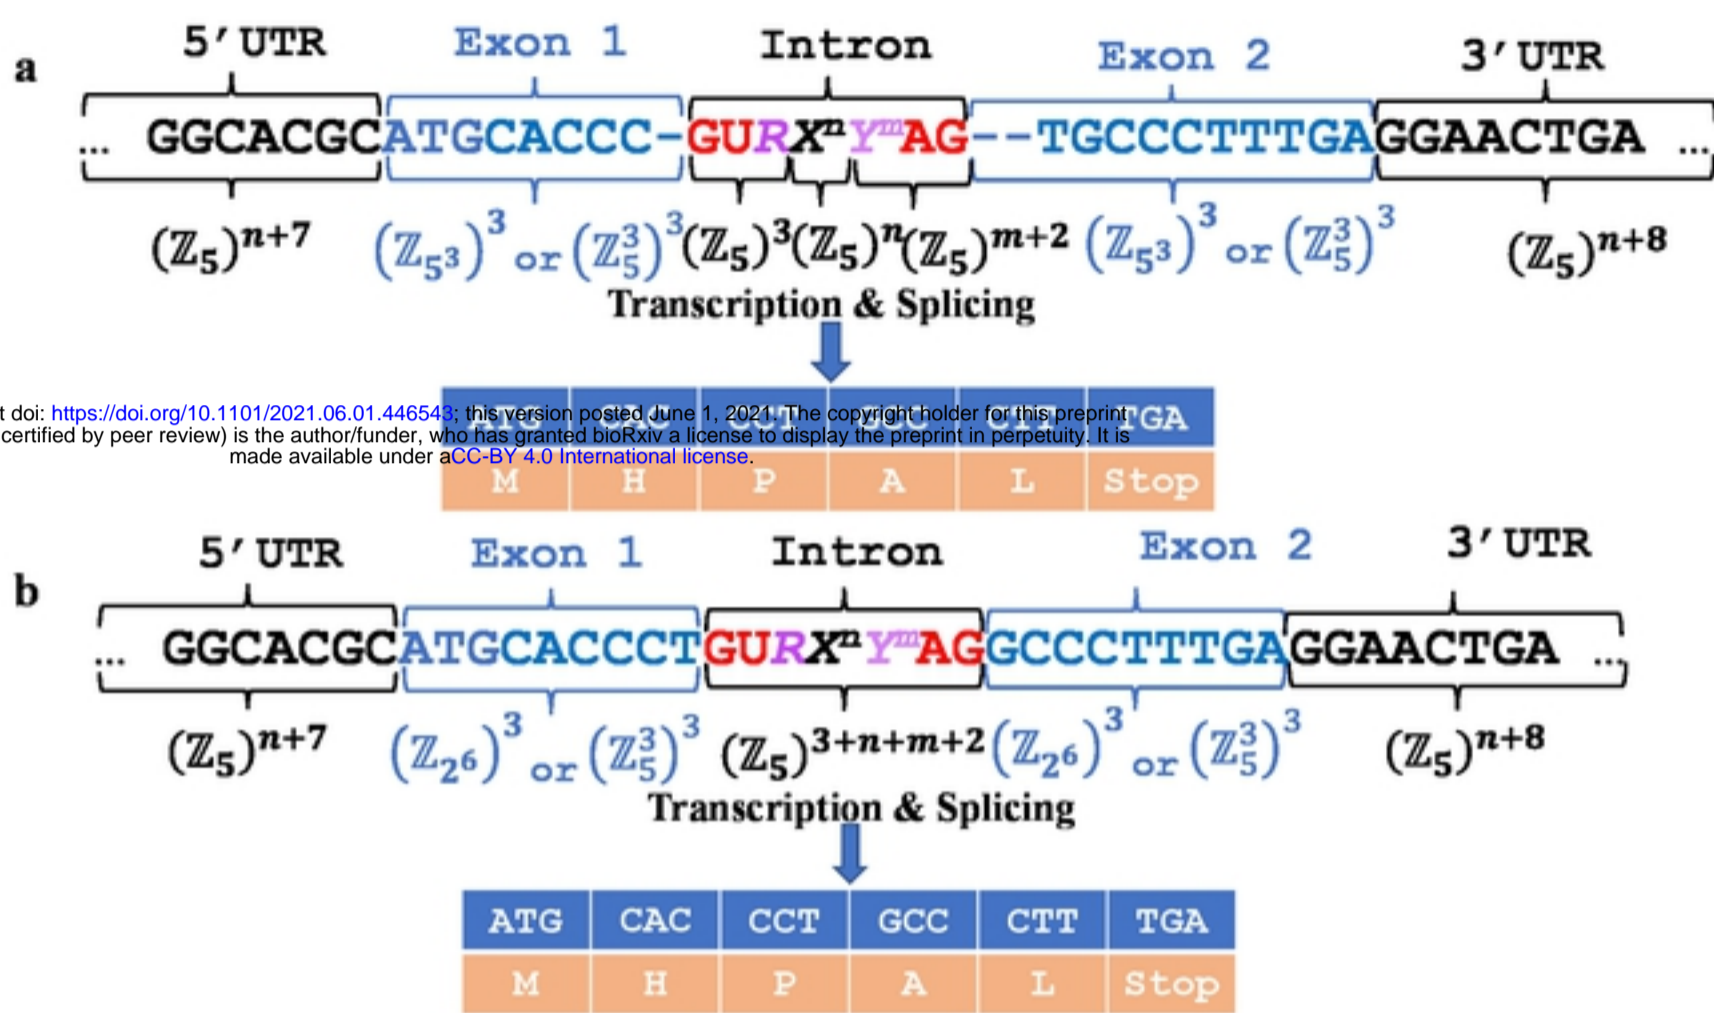

Figure 3

bioRxiv preprint doi: <https://doi.org/10.1101/2021.06.01.446543>; this version posted June 1, 2021. The copyright holder for this preprint (which was not certified by peer review) is the author/funder, who has granted bioRxiv a license to display the preprint in perpetuity. It is made available under aCC-BY 4.0 International license.

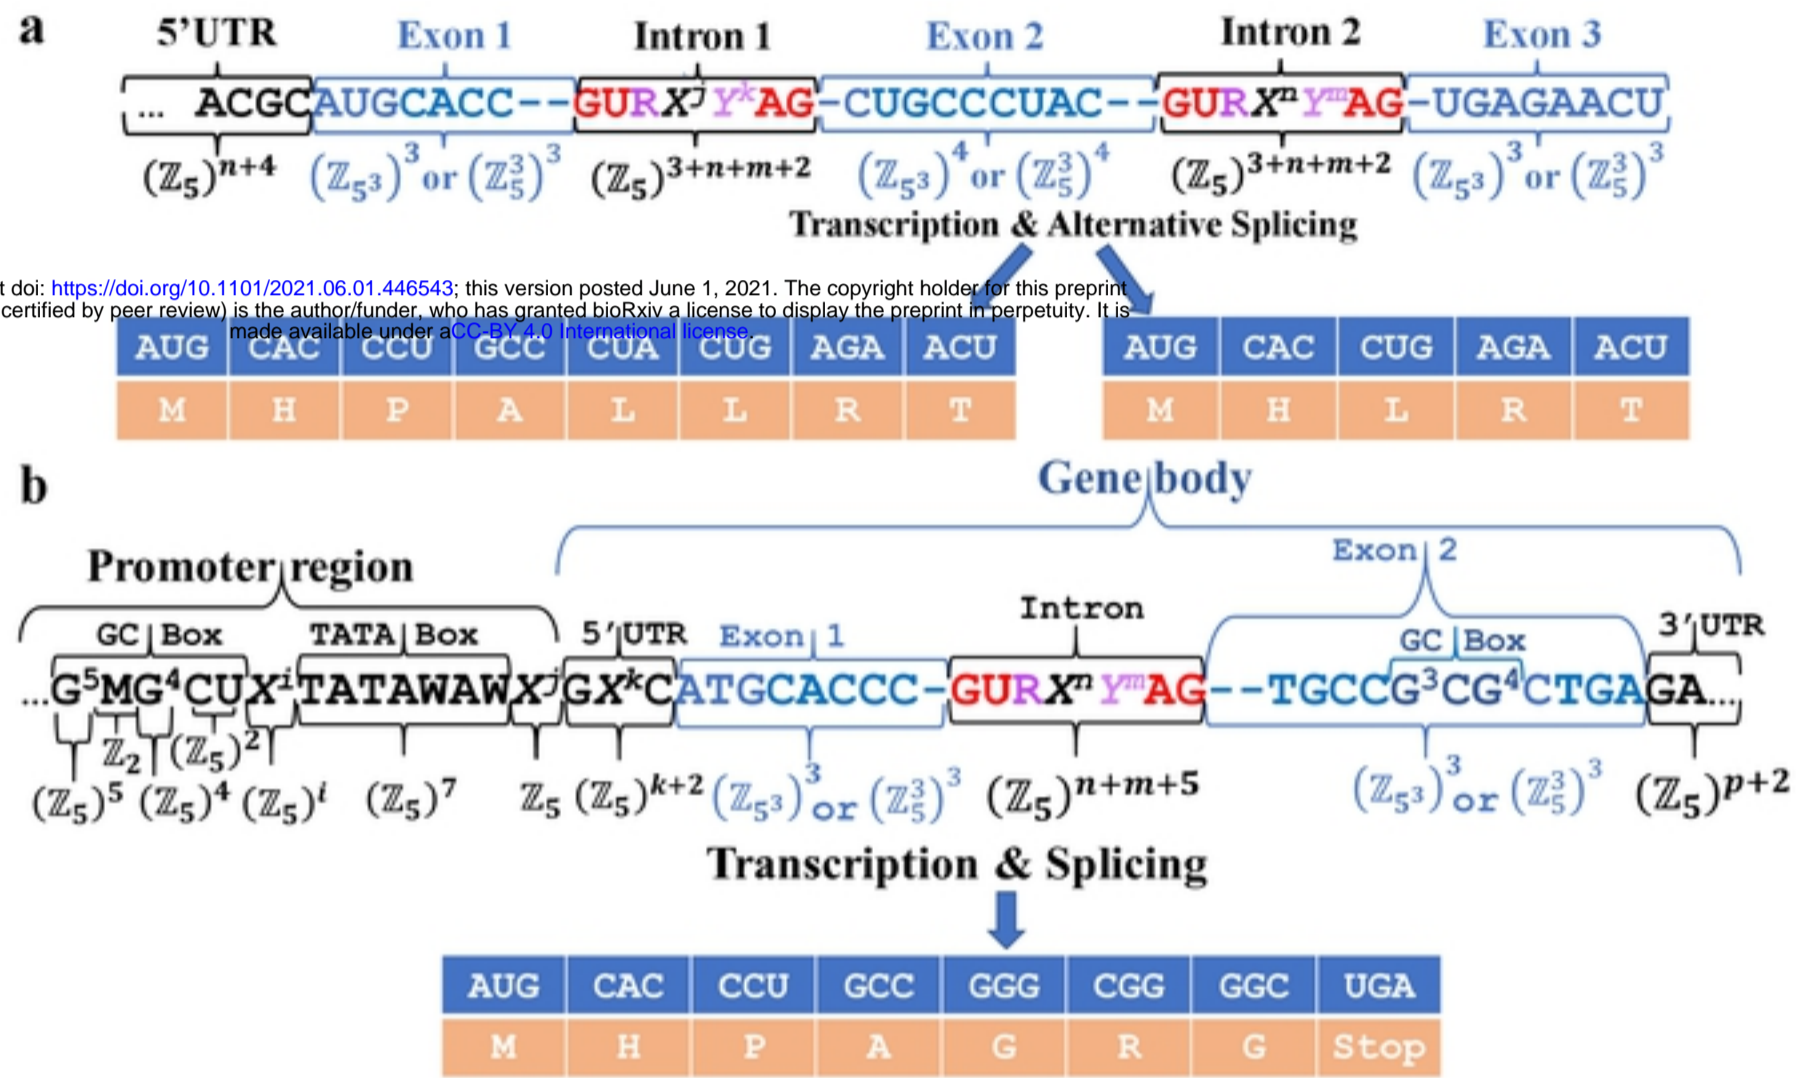

Figure 4

bioRxiv preprint doi: <https://doi.org/10.1101/2021.06.01.446546>; this version posted June 1, 2021. The copyright holder for this preprint (which was not certified by peer review) is the author/funder, who has granted bioRxiv a license to display the preprint in perpetuity. It is made available under aCC-BY 4.0 International license.

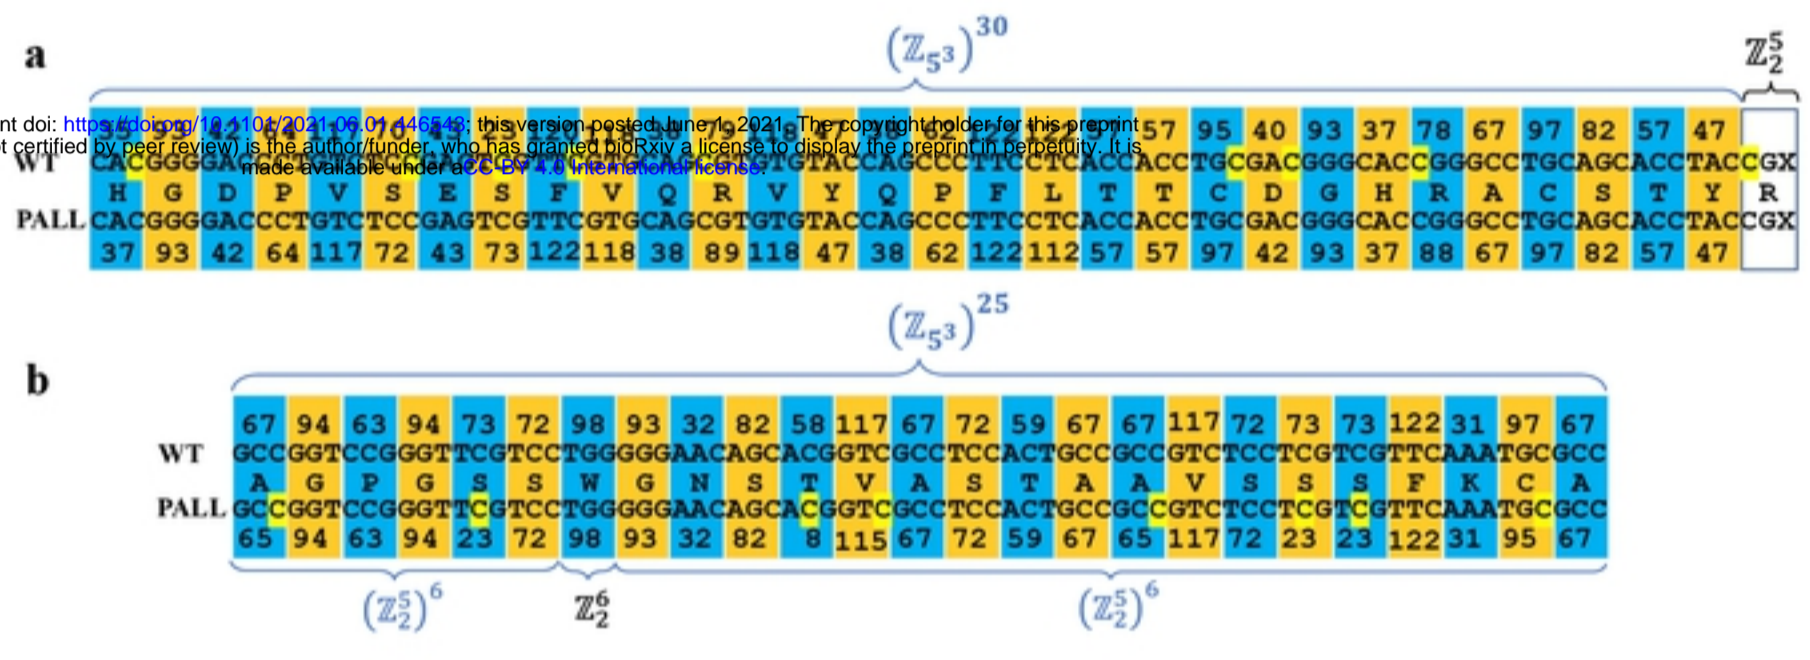

Figure 5



bioRxiv preprint doi: <https://doi.org/10.1101/2021.06.01.445543>; this version posted June 1, 2021. The copyright holder for this preprint (which was not certified by peer review) is the author/funder, who has granted bioRxiv a license to display the preprint in perpetuity. It is made available under aCC-BY 4.0 International license.

NM\_001159727.2:54-83\_Homo\_sapiens  
 XM\_019950502.2:111-140\_Tursiops\_truncatus  
 XM\_033408778.1:115-144\_Orcinus\_orca  
 XM\_032876216.1:91-120\_Lontra\_canadensis  
 XM\_032602682.1:115-144\_Phocoena\_sinus  
 XM\_032310131.1:107-136\_Mustela\_erminea  
 LR738414.1:88042426-88042455\_Lutra\_lutra  
 XM\_030890450.1:102-142\_Globicephala\_melas  
 XM\_030821458.1:66-95\_Nomascus\_leucogenys  
 XM\_022550731.2:109-138\_Delphinapterus\_leucas  
 XM\_030336151.1:55-84\_Lynx\_canadensis  
 XM\_029922190.1:78-107\_Suricata\_suricatta  
 XM\_015152887.2:74-103\_Macaca\_mulatta

REST (NRSF) footprint motif

One letter symbol of amino-acid translation

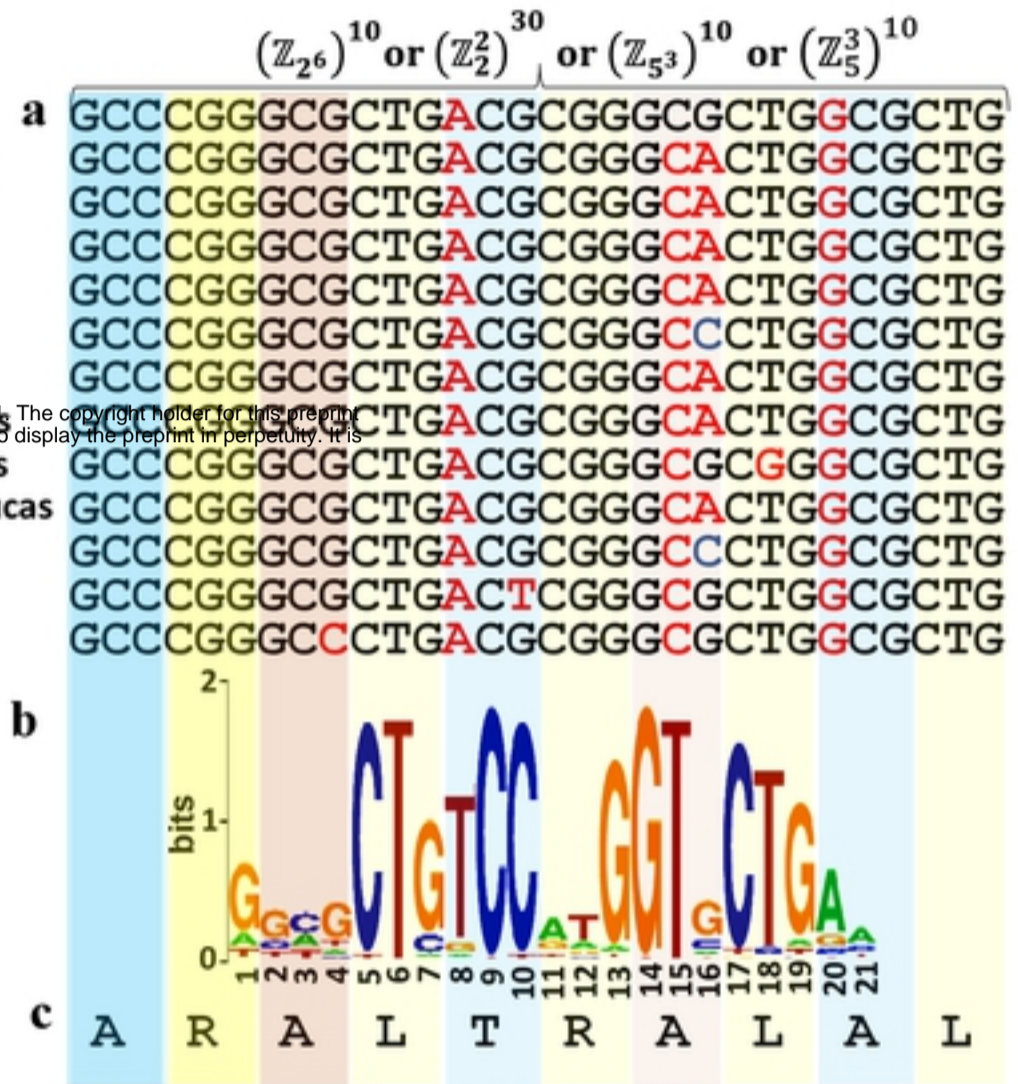

Figure 2
